# Supplementary material
Source: publisher figshare collection journal article supplement (https://acs.figshare.com/ndownloader/files/4114051)
Supplement: Supplementary file 1 [file 4114051]

 
data_a02222012_0m 
 
_audit_creation_method            SHELXL-97 
_chemical_name_systematic 
; 
 ? 
; 
_chemical_name_common             ? 
_chemical_melting_point           ? 
_chemical_formula_moiety          ? 
_chemical_formula_sum 
 'C17 H17 F3 N2 O9 P Re S' 
_chemical_formula_weight          699.56 
 
loop_ 
 _atom_type_symbol 
 _atom_type_description 
 _atom_type_scat_dispersion_real 
 _atom_type_scat_dispersion_imag 
 _atom_type_scat_source 
 'C'  'C'   0.0033   0.0016 
 'International Tables Vol C Tables 4.2.6.8 and 6.1.1.4' 
 'H'  'H'   0.0000   0.0000 
 'International Tables Vol C Tables 4.2.6.8 and 6.1.1.4' 
 'N'  'N'   0.0061   0.0033 
 'International Tables Vol C Tables 4.2.6.8 and 6.1.1.4' 
 'O'  'O'   0.0106   0.0060 
 'International Tables Vol C Tables 4.2.6.8 and 6.1.1.4' 
 'F'  'F'   0.0171   0.0103 
 'International Tables Vol C Tables 4.2.6.8 and 6.1.1.4' 
 'P'  'P'   0.1023   0.0942 
 'International Tables Vol C Tables 4.2.6.8 and 6.1.1.4' 
 'S'  'S'   0.1246   0.1234 
 'International Tables Vol C Tables 4.2.6.8 and 6.1.1.4' 
 'Re'  'Re'  -1.0185   7.2310 
 'International Tables Vol C Tables 4.2.6.8 and 6.1.1.4' 
 
_symmetry_cell_setting            monoclinic 
_symmetry_space_group_name_H-M    P2(1)/c 
 
loop_ 
 _symmetry_equiv_pos_as_xyz 
 'x, y, z' 
 '-x, y+1/2, -z+1/2' 
 '-x, -y, -z' 
 'x, -y-1/2, z-1/2' 
 
_cell_length_a                    12.7662(8) 
_cell_length_b                    12.1448(8) 
_cell_length_c                    14.8497(10) 
_cell_angle_alpha                 90.00 
_cell_angle_beta                  94.3050(10) 
_cell_angle_gamma                 90.00 
_cell_volume                      2295.8(3) 
_cell_formula_units_Z             4 
_cell_measurement_temperature     100(2) 
_cell_measurement_reflns_used     ? 
_cell_measurement_theta_min       ? 
_cell_measurement_theta_max       ? 
 
_exptl_crystal_description        block 
_exptl_crystal_colour             yellow 
_exptl_crystal_size_max           0.25 
_exptl_crystal_size_mid           0.15 
_exptl_crystal_size_min           0.10 
_exptl_crystal_density_meas       ? 
_exptl_crystal_density_diffrn     2.024 
_exptl_crystal_density_method     'not measured' 
_exptl_crystal_F_000              1352 
_exptl_absorpt_coefficient_mu     5.529 
_exptl_absorpt_correction_type    'multi-scan' 
_exptl_absorpt_correction_T_min   0.6257
_exptl_absorpt_correction_T_max   0.7489 
_exptl_absorpt_process_details    'sadabs' 
 
_exptl_special_details 
; 
 ? 
; 
 
_diffrn_ambient_temperature       100(2) 
_diffrn_radiation_wavelength      0.71073 
_diffrn_radiation_type            MoK\a 
_diffrn_radiation_source          'fine-focus sealed tube' 
_diffrn_radiation_monochromator   graphite 
_diffrn_measurement_device_type   'Bruker Kappa Apex' 
_diffrn_measurement_method        'Omega scan' 
_diffrn_detector_area_resol_mean  ? 
_diffrn_reflns_number             23091 
_diffrn_reflns_av_R_equivalents   0.0154 
_diffrn_reflns_av_sigmaI/netI     0.0189 
_diffrn_reflns_limit_h_min        -19 
_diffrn_reflns_limit_h_max        19 
_diffrn_reflns_limit_k_min        -18 
_diffrn_reflns_limit_k_max        18 
_diffrn_reflns_limit_l_min        -12 
_diffrn_reflns_limit_l_max        22 
_diffrn_reflns_theta_min          1.60 
_diffrn_reflns_theta_max          33.14 
_reflns_number_total              8759 
_reflns_number_gt                 7739 
_reflns_threshold_expression      >2sigma(I) 
 
_computing_data_collection        ? 
_computing_cell_refinement        ? 
_computing_data_reduction         ? 
_computing_structure_solution     'SHELXS-97 (Sheldrick, 2008)' 
_computing_structure_refinement   'SHELXL-97 (Sheldrick, 2008)' 
_computing_molecular_graphics     ? 
_computing_publication_material   ? 
 
_refine_special_details 
; 
 Refinement of F^2^ against ALL reflections.  The weighted R-factor wR and 
 goodness of fit S are based on F^2^, conventional R-factors R are based 
 on F, with F set to zero for negative F^2^. The threshold expression of 
 F^2^ > 2sigma(F^2^) is used only for calculating R-factors(gt) etc. and is 
 not relevant to the choice of reflections for refinement.  R-factors based 
 on F^2^ are statistically about twice as large as those based on F, and R- 
 factors based on ALL data will be even larger. 
; 
 
_refine_ls_structure_factor_coef  Fsqd  
_refine_ls_matrix_type            full 
_refine_ls_weighting_scheme       calc  
_refine_ls_weighting_details 
 'calc w=1/[\s^2^(Fo^2^)+(0.0000P)^2^+0.0000P] where P=(Fo^2^+2Fc^2^)/3' 
_atom_sites_solution_primary      direct 
_atom_sites_solution_secondary    difmap 
_atom_sites_solution_hydrogens    geom 
_refine_ls_hydrogen_treatment     constr 
_refine_ls_extinction_method      none 
_refine_ls_extinction_coef        ? 
_refine_ls_number_reflns          8759 
_refine_ls_number_parameters      310 
_refine_ls_number_restraints      0 
_refine_ls_R_factor_all           0.0212 
_refine_ls_R_factor_gt            0.0160 
_refine_ls_wR_factor_ref          0.0296 
_refine_ls_wR_factor_gt           0.0290 
_refine_ls_goodness_of_fit_ref    1.560 
_refine_ls_restrained_S_all       1.560 
_refine_ls_shift/su_max           0.004 
_refine_ls_shift/su_mean          0.000 
 
loop_ 
 _atom_site_label 
 _atom_site_type_symbol 
 _atom_site_fract_x 
 _atom_site_fract_y 
 _atom_site_fract_z 
 _atom_site_U_iso_or_equiv 
 _atom_site_adp_type 
 _atom_site_occupancy 
 _atom_site_symmetry_multiplicity 
 _atom_site_calc_flag 
 _atom_site_refinement_flags 
 _atom_site_disorder_assembly 
 _atom_site_disorder_group 
C1 C 0.08428(12) 0.09821(13) 0.88058(9) 0.0196(3) Uani 1 1 d . . . 
C2 C 0.08290(11) 0.30496(12) 0.79681(9) 0.0171(3) Uani 1 1 d . . . 
C3 C 0.25629(12) 0.17209(12) 0.79970(9) 0.0188(3) Uani 1 1 d . . . 
C4 C 0.34382(11) 0.40993(12) 0.88754(9) 0.0172(3) Uani 1 1 d . . . 
H4 H 0.3695 0.3657 0.8412 0.021 Uiso 1 1 calc R . . 
C5 C 0.39635(12) 0.50639(12) 0.91242(10) 0.0214(3) Uani 1 1 d . . . 
H5 H 0.4564 0.5285 0.8829 0.026 Uiso 1 1 calc R . . 
C6 C 0.36041(13) 0.56995(12) 0.98061(11) 0.0242(3) Uani 1 1 d . . . 
H6 H 0.3956 0.6362 0.9987 0.029 Uiso 1 1 calc R . . 
C7 C 0.27235(12) 0.53621(12) 1.02251(10) 0.0214(3) Uani 1 1 d . . . 
H7 H 0.2468 0.5788 1.0699 0.026 Uiso 1 1 calc R . . 
C8 C 0.22206(11) 0.43944(11) 0.99438(9) 0.0148(3) Uani 1 1 d . . . 
C9 C 0.12589(11) 0.39911(11) 1.03315(9) 0.0144(3) Uani 1 1 d . . . 
C10 C 0.07923(12) 0.45153(12) 1.10309(9) 0.0187(3) Uani 1 1 d . . . 
H10 H 0.1103 0.5156 1.1303 0.022 Uiso 1 1 calc R . . 
C11 C -0.01288(12) 0.40953(12) 1.13267(10) 0.0202(3) Uani 1 1 d . . . 
H11 H -0.0449 0.4437 1.1812 0.024 Uiso 1 1 calc R . . 
C12 C -0.05789(12) 0.31736(13) 1.09094(10) 0.0206(3) Uani 1 1 d . . . 
H12 H -0.1223 0.2886 1.1090 0.025 Uiso 1 1 calc R . . 
C13 C -0.00735(12) 0.26793(12) 1.02257(9) 0.0176(3) Uani 1 1 d . . . 
H13 H -0.0382 0.2045 0.9941 0.021 Uiso 1 1 calc R . . 
C14 C 0.20992(13) 0.09986(14) 1.10856(10) 0.0239(3) Uani 1 1 d . . . 
H14A H 0.1666 0.1641 1.1233 0.029 Uiso 1 1 calc R . . 
H14B H 0.1618 0.0375 1.0936 0.029 Uiso 1 1 calc R . . 
C15 C 0.33502(12) 0.00300(12) 0.96981(10) 0.0199(3) Uani 1 1 d . . . 
H15A H 0.2761 -0.0457 0.9484 0.024 Uiso 1 1 calc R . . 
H15B H 0.3767 0.0186 0.9177 0.024 Uiso 1 1 calc R . . 
C16 C 0.39869(12) 0.20442(12) 1.05846(10) 0.0196(3) Uani 1 1 d . . . 
H16A H 0.3781 0.2743 1.0866 0.023 Uiso 1 1 calc R . . 
H16B H 0.4349 0.1579 1.1059 0.023 Uiso 1 1 calc R . . 
C17 C 0.63002(14) 0.26346(14) 0.75455(12) 0.0286(4) Uani 1 1 d . . . 
F1 F 0.56095(8) 0.18243(10) 0.76140(8) 0.0449(3) Uani 1 1 d . . . 
F2 F 0.59406(9) 0.35204(9) 0.79529(8) 0.0481(3) Uani 1 1 d . . . 
F3 F 0.63370(11) 0.28648(9) 0.66724(7) 0.0475(3) Uani 1 1 d . . . 
N1 N 0.25764(9) 0.37694(9) 0.92693(7) 0.0140(2) Uani 1 1 d . . . 
N2 N 0.08404(9) 0.30593(9) 0.99452(7) 0.0135(2) Uani 1 1 d . . . 
O1 O 0.03152(10) 0.02103(10) 0.87975(8) 0.0344(3) Uani 1 1 d . . . 
O2 O 0.03375(9) 0.34933(9) 0.74088(7) 0.0253(2) Uani 1 1 d . . . 
O3 O 0.30607(9) 0.14066(10) 0.74348(7) 0.0284(3) Uani 1 1 d . . . 
O4 O 0.27669(10) 0.07191(9) 1.18536(7) 0.0250(2) Uani 1 1 d . . . 
H4O H 0.2594 0.0100 1.2047 0.038 Uiso 1 1 calc R . . 
O5 O 0.39976(9) -0.05385(9) 1.03679(7) 0.0261(2) Uani 1 1 d . . . 
H5O H 0.3620 -0.0923 1.0684 0.039 Uiso 1 1 calc R . . 
O6 O 0.46743(8) 0.22658(9) 0.98996(8) 0.0223(2) Uani 1 1 d . . . 
H6O H 0.5053 0.1712 0.9827 0.033 Uiso 1 1 calc R . . 
O7 O 0.73973(10) 0.19625(10) 0.89653(7) 0.0278(3) Uani 1 1 d . . . 
O8 O 0.78673(9) 0.13016(9) 0.75078(7) 0.0243(2) Uani 1 1 d . . . 
O9 O 0.82168(10) 0.32079(10) 0.79527(8) 0.0330(3) Uani 1 1 d . . . 
P P 0.28096(3) 0.13297(3) 1.00916(2) 0.01327(7) Uani 1 1 d . . . 
Re1 Re 0.170682(4) 0.227282(4) 0.891208(3) 0.01206(2) Uani 1 1 d . . . 
S S 0.75942(3) 0.22377(3) 0.80463(2) 0.01802(7) Uani 1 1 d . . . 
 
loop_ 
 _atom_site_aniso_label 
 _atom_site_aniso_U_11 
 _atom_site_aniso_U_22 
 _atom_site_aniso_U_33 
 _atom_site_aniso_U_23 
 _atom_site_aniso_U_13 
 _atom_site_aniso_U_12 
C1 0.0184(7) 0.0232(7) 0.0177(6) -0.0058(6) 0.0040(6) -0.0029(6) 
C2 0.0146(7) 0.0205(7) 0.0166(6) -0.0022(5) 0.0039(5) -0.0032(5) 
C3 0.0185(7) 0.0207(7) 0.0170(6) 0.0013(5) 0.0007(5) -0.0031(6) 
C4 0.0144(7) 0.0198(7) 0.0173(6) 0.0054(5) 0.0007(5) -0.0010(5) 
C5 0.0167(7) 0.0217(7) 0.0255(7) 0.0091(6) -0.0012(6) -0.0055(6) 
C6 0.0226(8) 0.0170(7) 0.0320(8) 0.0021(6) -0.0046(7) -0.0070(6) 
C7 0.0209(8) 0.0158(6) 0.0271(7) -0.0018(6) -0.0022(6) -0.0030(6) 
C8 0.0136(7) 0.0129(6) 0.0173(6) 0.0019(5) -0.0022(5) 0.0004(5) 
C9 0.0143(6) 0.0138(6) 0.0149(6) 0.0008(5) -0.0013(5) -0.0002(5) 
C10 0.0208(7) 0.0161(6) 0.0189(6) -0.0019(5) -0.0005(6) 0.0026(6) 
C11 0.0221(8) 0.0210(7) 0.0180(6) -0.0013(6) 0.0046(6) 0.0053(6) 
C12 0.0171(7) 0.0231(7) 0.0220(7) 0.0021(6) 0.0053(6) 0.0021(6) 
C13 0.0154(7) 0.0182(6) 0.0195(6) -0.0004(6) 0.0028(5) -0.0024(6) 
C14 0.0197(8) 0.0340(9) 0.0186(7) 0.0082(6) 0.0066(6) 0.0056(7) 
C15 0.0214(8) 0.0153(6) 0.0236(7) 0.0018(6) 0.0055(6) 0.0024(6) 
C16 0.0154(7) 0.0212(7) 0.0215(6) -0.0009(5) -0.0024(6) -0.0012(5) 
C17 0.0269(9) 0.0296(8) 0.0289(8) -0.0058(7) -0.0006(7) 0.0036(7) 
F1 0.0218(6) 0.0546(7) 0.0576(7) -0.0134(6) -0.0010(5) -0.0104(5) 
F2 0.0427(7) 0.0423(7) 0.0579(7) -0.0178(6) -0.0048(6) 0.0206(5) 
F3 0.0609(8) 0.0503(7) 0.0291(5) 0.0061(5) -0.0111(5) 0.0124(6) 
N1 0.0133(6) 0.0140(5) 0.0143(5) 0.0022(4) -0.0010(4) -0.0013(4) 
N2 0.0122(5) 0.0144(5) 0.0140(5) -0.0001(4) 0.0013(4) 0.0001(4) 
O1 0.0321(7) 0.0308(7) 0.0409(7) -0.0121(6) 0.0078(6) -0.0165(6) 
O2 0.0195(6) 0.0358(7) 0.0204(5) 0.0059(5) 0.0007(4) 0.0034(5) 
O3 0.0288(6) 0.0355(7) 0.0222(5) -0.0034(5) 0.0114(5) 0.0024(5) 
O4 0.0331(7) 0.0251(6) 0.0165(5) 0.0059(4) -0.0005(5) -0.0030(5) 
O5 0.0265(6) 0.0237(6) 0.0295(6) 0.0118(5) 0.0115(5) 0.0100(5) 
O6 0.0149(5) 0.0167(5) 0.0357(6) 0.0041(5) 0.0054(5) 0.0005(4) 
O7 0.0329(7) 0.0322(6) 0.0188(5) 0.0012(5) 0.0050(5) -0.0052(5) 
O8 0.0284(6) 0.0195(5) 0.0260(5) -0.0013(4) 0.0087(5) 0.0015(5) 
O9 0.0317(7) 0.0274(6) 0.0417(7) -0.0062(5) 0.0146(6) -0.0152(5) 
P 0.01240(16) 0.01405(15) 0.01362(14) 0.00030(12) 0.00265(13) -0.00069(13) 
Re1 0.01100(2) 0.01391(2) 0.01132(2) -0.00098(2) 0.00112(2) -0.00212(2) 
S 0.01700(17) 0.01825(16) 0.01928(15) -0.00078(14) 0.00451(13) -0.00407(14) 
 
_geom_special_details 
; 
 All esds (except the esd in the dihedral angle between two l.s. planes) 
 are estimated using the full covariance matrix.  The cell esds are taken 
 into account individually in the estimation of esds in distances, angles 
 and torsion angles; correlations between esds in cell parameters are only 
 used when they are defined by crystal symmetry.  An approximate (isotropic) 
 treatment of cell esds is used for estimating esds involving l.s. planes. 
; 
 
loop_ 
 _geom_bond_atom_site_label_1 
 _geom_bond_atom_site_label_2 
 _geom_bond_distance 
 _geom_bond_site_symmetry_2 
 _geom_bond_publ_flag 
C1 O1 1.1537(18) . ? 
C1 Re1 1.9164(15) . ? 
C2 O2 1.1383(17) . ? 
C2 Re1 1.9685(14) . ? 
C3 O3 1.1516(17) . ? 
C3 Re1 1.9270(15) . ? 
C4 N1 1.3453(18) . ? 
C4 C5 1.386(2) . ? 
C4 H4 0.9500 . ? 
C5 C6 1.379(2) . ? 
C5 H5 0.9500 . ? 
C6 C7 1.387(2) . ? 
C6 H6 0.9500 . ? 
C7 C8 1.389(2) . ? 
C7 H7 0.9500 . ? 
C8 N1 1.3616(17) . ? 
C8 C9 1.478(2) . ? 
C9 N2 1.3598(17) . ? 
C9 C10 1.390(2) . ? 
C10 C11 1.383(2) . ? 
C10 H10 0.9500 . ? 
C11 C12 1.383(2) . ? 
C11 H11 0.9500 . ? 
C12 C13 1.380(2) . ? 
C12 H12 0.9500 . ? 
C13 N2 1.3493(18) . ? 
C13 H13 0.9500 . ? 
C14 O4 1.4129(17) . ? 
C14 P 1.8341(15) . ? 
C14 H14A 0.9900 . ? 
C14 H14B 0.9900 . ? 
C15 O5 1.4232(17) . ? 
C15 P 1.8358(15) . ? 
C15 H15A 0.9900 . ? 
C15 H15B 0.9900 . ? 
C16 O6 1.4181(18) . ? 
C16 P 1.8393(14) . ? 
C16 H16A 0.9900 . ? 
C16 H16B 0.9900 . ? 
C17 F3 1.331(2) . ? 
C17 F1 1.330(2) . ? 
C17 F2 1.3325(19) . ? 
C17 S 1.8248(18) . ? 
N1 Re1 2.1746(11) . ? 
N2 Re1 2.1782(12) . ? 
O4 H4O 0.8400 . ? 
O5 H5O 0.8400 . ? 
O6 H6O 0.8400 . ? 
O7 S 1.4452(11) . ? 
O8 S 1.4475(11) . ? 
O9 S 1.4340(12) . ? 
P Re1 2.4478(4) . ? 
 
loop_ 
 _geom_angle_atom_site_label_1 
 _geom_angle_atom_site_label_2 
 _geom_angle_atom_site_label_3 
 _geom_angle 
 _geom_angle_site_symmetry_1 
 _geom_angle_site_symmetry_3 
 _geom_angle_publ_flag 
O1 C1 Re1 175.82(13) . . ? 
O2 C2 Re1 178.47(13) . . ? 
O3 C3 Re1 178.33(13) . . ? 
N1 C4 C5 122.06(14) . . ? 
N1 C4 H4 119.0 . . ? 
C5 C4 H4 119.0 . . ? 
C6 C5 C4 119.20(15) . . ? 
C6 C5 H5 120.4 . . ? 
C4 C5 H5 120.4 . . ? 
C5 C6 C7 119.32(14) . . ? 
C5 C6 H6 120.3 . . ? 
C7 C6 H6 120.3 . . ? 
C8 C7 C6 119.15(15) . . ? 
C8 C7 H7 120.4 . . ? 
C6 C7 H7 120.4 . . ? 
N1 C8 C7 121.40(14) . . ? 
N1 C8 C9 115.76(12) . . ? 
C7 C8 C9 122.83(13) . . ? 
N2 C9 C10 121.30(13) . . ? 
N2 C9 C8 115.02(12) . . ? 
C10 C9 C8 123.67(13) . . ? 
C11 C10 C9 119.38(13) . . ? 
C11 C10 H10 120.3 . . ? 
C9 C10 H10 120.3 . . ? 
C12 C11 C10 119.38(14) . . ? 
C12 C11 H11 120.3 . . ? 
C10 C11 H11 120.3 . . ? 
C13 C12 C11 118.68(15) . . ? 
C13 C12 H12 120.7 . . ? 
C11 C12 H12 120.7 . . ? 
N2 C13 C12 122.75(14) . . ? 
N2 C13 H13 118.6 . . ? 
C12 C13 H13 118.6 . . ? 
O4 C14 P 113.42(11) . . ? 
O4 C14 H14A 108.9 . . ? 
P C14 H14A 108.9 . . ? 
O4 C14 H14B 108.9 . . ? 
P C14 H14B 108.9 . . ? 
H14A C14 H14B 107.7 . . ? 
O5 C15 P 114.03(10) . . ? 
O5 C15 H15A 108.7 . . ? 
P C15 H15A 108.7 . . ? 
O5 C15 H15B 108.7 . . ? 
P C15 H15B 108.7 . . ? 
H15A C15 H15B 107.6 . . ? 
O6 C16 P 109.59(9) . . ? 
O6 C16 H16A 109.8 . . ? 
P C16 H16A 109.8 . . ? 
O6 C16 H16B 109.8 . . ? 
P C16 H16B 109.8 . . ? 
H16A C16 H16B 108.2 . . ? 
F3 C17 F1 107.58(14) . . ? 
F3 C17 F2 108.14(14) . . ? 
F1 C17 F2 108.03(15) . . ? 
F3 C17 S 110.83(13) . . ? 
F1 C17 S 111.00(12) . . ? 
F2 C17 S 111.13(11) . . ? 
C4 N1 C8 118.86(12) . . ? 
C4 N1 Re1 124.20(9) . . ? 
C8 N1 Re1 116.93(9) . . ? 
C13 N2 C9 118.42(12) . . ? 
C13 N2 Re1 124.33(9) . . ? 
C9 N2 Re1 117.25(10) . . ? 
C14 O4 H4O 109.5 . . ? 
C15 O5 H5O 109.5 . . ? 
C16 O6 H6O 109.5 . . ? 
C14 P C15 106.75(7) . . ? 
C14 P C16 102.82(7) . . ? 
C15 P C16 102.52(7) . . ? 
C14 P Re1 112.70(5) . . ? 
C15 P Re1 112.60(5) . . ? 
C16 P Re1 118.23(5) . . ? 
C1 Re1 C3 90.62(6) . . ? 
C1 Re1 C2 92.29(6) . . ? 
C3 Re1 C2 89.26(6) . . ? 
C1 Re1 N1 169.70(5) . . ? 
C3 Re1 N1 99.01(5) . . ? 
C2 Re1 N1 91.49(5) . . ? 
C1 Re1 N2 95.57(5) . . ? 
C3 Re1 N2 173.79(5) . . ? 
C2 Re1 N2 89.97(5) . . ? 
N1 Re1 N2 74.85(4) . . ? 
C1 Re1 P 88.44(5) . . ? 
C3 Re1 P 90.90(4) . . ? 
C2 Re1 P 179.25(4) . . ? 
N1 Re1 P 87.76(3) . . ? 
N2 Re1 P 89.79(3) . . ? 
O9 S O7 114.74(7) . . ? 
O9 S O8 115.69(7) . . ? 
O7 S O8 113.97(7) . . ? 
O9 S C17 103.58(8) . . ? 
O7 S C17 103.27(8) . . ? 
O8 S C17 103.33(7) . . ? 
 
loop_ 
 _geom_torsion_atom_site_label_1 
 _geom_torsion_atom_site_label_2 
 _geom_torsion_atom_site_label_3 
 _geom_torsion_atom_site_label_4 
 _geom_torsion 
 _geom_torsion_site_symmetry_1 
 _geom_torsion_site_symmetry_2 
 _geom_torsion_site_symmetry_3 
 _geom_torsion_site_symmetry_4 
 _geom_torsion_publ_flag 
N1 C4 C5 C6 1.0(2) . . . . ? 
C4 C5 C6 C7 -0.2(2) . . . . ? 
C5 C6 C7 C8 -0.4(2) . . . . ? 
C6 C7 C8 N1 0.3(2) . . . . ? 
C6 C7 C8 C9 -178.00(13) . . . . ? 
N1 C8 C9 N2 -1.59(17) . . . . ? 
C7 C8 C9 N2 176.78(13) . . . . ? 
N1 C8 C9 C10 179.19(12) . . . . ? 
C7 C8 C9 C10 -2.4(2) . . . . ? 
N2 C9 C10 C11 -1.5(2) . . . . ? 
C8 C9 C10 C11 177.72(13) . . . . ? 
C9 C10 C11 C12 -1.2(2) . . . . ? 
C10 C11 C12 C13 2.0(2) . . . . ? 
C11 C12 C13 N2 -0.2(2) . . . . ? 
C5 C4 N1 C8 -1.1(2) . . . . ? 
C5 C4 N1 Re1 179.71(10) . . . . ? 
C7 C8 N1 C4 0.47(19) . . . . ? 
C9 C8 N1 C4 178.86(11) . . . . ? 
C7 C8 N1 Re1 179.69(10) . . . . ? 
C9 C8 N1 Re1 -1.92(14) . . . . ? 
C12 C13 N2 C9 -2.4(2) . . . . ? 
C12 C13 N2 Re1 177.20(10) . . . . ? 
C10 C9 N2 C13 3.24(19) . . . . ? 
C8 C9 N2 C13 -176.00(12) . . . . ? 
C10 C9 N2 Re1 -176.41(10) . . . . ? 
C8 C9 N2 Re1 4.35(15) . . . . ? 
O4 C14 P C15 71.23(13) . . . . ? 
O4 C14 P C16 -36.26(13) . . . . ? 
O4 C14 P Re1 -164.64(9) . . . . ? 
O5 C15 P C14 -55.94(13) . . . . ? 
O5 C15 P C16 51.76(12) . . . . ? 
O5 C15 P Re1 179.88(9) . . . . ? 
O6 C16 P C14 174.52(10) . . . . ? 
O6 C16 P C15 63.84(11) . . . . ? 
O6 C16 P Re1 -60.64(11) . . . . ? 
O1 C1 Re1 C3 146(2) . . . . ? 
O1 C1 Re1 C2 -124(2) . . . . ? 
O1 C1 Re1 N1 -13(2) . . . . ? 
O1 C1 Re1 N2 -34(2) . . . . ? 
O1 C1 Re1 P 55(2) . . . . ? 
O3 C3 Re1 C1 98(5) . . . . ? 
O3 C3 Re1 C2 5(5) . . . . ? 
O3 C3 Re1 N1 -86(5) . . . . ? 
O3 C3 Re1 N2 -78(5) . . . . ? 
O3 C3 Re1 P -174(100) . . . . ? 
O2 C2 Re1 C1 -101(5) . . . . ? 
O2 C2 Re1 C3 -10(5) . . . . ? 
O2 C2 Re1 N1 89(5) . . . . ? 
O2 C2 Re1 N2 164(5) . . . . ? 
O2 C2 Re1 P 93(6) . . . . ? 
C4 N1 Re1 C1 160.3(3) . . . . ? 
C8 N1 Re1 C1 -18.9(3) . . . . ? 
C4 N1 Re1 C3 1.33(11) . . . . ? 
C8 N1 Re1 C3 -177.84(9) . . . . ? 
C4 N1 Re1 C2 -88.16(11) . . . . ? 
C8 N1 Re1 C2 92.67(10) . . . . ? 
C4 N1 Re1 N2 -177.72(11) . . . . ? 
C8 N1 Re1 N2 3.11(9) . . . . ? 
C4 N1 Re1 P 91.89(10) . . . . ? 
C8 N1 Re1 P -87.29(9) . . . . ? 
C13 N2 Re1 C1 -7.52(12) . . . . ? 
C9 N2 Re1 C1 172.12(10) . . . . ? 
C13 N2 Re1 C3 167.7(4) . . . . ? 
C9 N2 Re1 C3 -12.7(5) . . . . ? 
C13 N2 Re1 C2 84.78(11) . . . . ? 
C9 N2 Re1 C2 -95.59(10) . . . . ? 
C13 N2 Re1 N1 176.34(12) . . . . ? 
C9 N2 Re1 N1 -4.03(9) . . . . ? 
C13 N2 Re1 P -95.93(11) . . . . ? 
C9 N2 Re1 P 83.71(9) . . . . ? 
C14 P Re1 C1 -62.99(8) . . . . ? 
C15 P Re1 C1 57.84(7) . . . . ? 
C16 P Re1 C1 177.18(7) . . . . ? 
C14 P Re1 C3 -153.58(8) . . . . ? 
C15 P Re1 C3 -32.75(7) . . . . ? 
C16 P Re1 C3 86.59(7) . . . . ? 
C14 P Re1 C2 104(3) . . . . ? 
C15 P Re1 C2 -136(3) . . . . ? 
C16 P Re1 C2 -16(3) . . . . ? 
C14 P Re1 N1 107.44(7) . . . . ? 
C15 P Re1 N1 -131.73(6) . . . . ? 
C16 P Re1 N1 -12.39(6) . . . . ? 
C14 P Re1 N2 32.59(7) . . . . ? 
C15 P Re1 N2 153.42(6) . . . . ? 
C16 P Re1 N2 -87.24(6) . . . . ? 
F3 C17 S O9 63.11(13) . . . . ? 
F1 C17 S O9 -177.41(11) . . . . ? 
F2 C17 S O9 -57.16(14) . . . . ? 
F3 C17 S O7 -176.94(12) . . . . ? 
F1 C17 S O7 -57.46(13) . . . . ? 
F2 C17 S O7 62.79(14) . . . . ? 
F3 C17 S O8 -57.93(13) . . . . ? 
F1 C17 S O8 61.55(13) . . . . ? 
F2 C17 S O8 -178.20(12) . . . . ? 
 
_diffrn_measured_fraction_theta_max    1.000 
_diffrn_reflns_theta_full              33.14 
_diffrn_measured_fraction_theta_full   1.000 
_refine_diff_density_max    0.698 
_refine_diff_density_min   -0.647 
_refine_diff_density_rms    0.090 
